# Supplementary material for: Genomic Prediction and Association Mapping of Curd-Related Traits in Gene Bank Accessions of Cauliflower
Source: PubMed Central journal article supplement (PMC5919744; doi:10.1534/g3.117.300199), 2017-12-18
Supplement: 707FileS1.pdf [file 707FileS1.pdf]

1 Genomic prediction and association mapping of curd-related traits in  
2 genebank accessions of cauliflower

3 Patrick Thorwarth Eltohamy A.A. Yousef Karl J. Schmid

4 December 14, 2017

5 **Table S1** Genbank accession informations and DAPC cluster classification.

| Accession | Type       | Year of collection | Genebank | Origin    | DAPC_cluster |
|-----------|------------|--------------------|----------|-----------|--------------|
| PI 165488 | Collector  | 1948               | USDA     | Asia      | 5            |
| PI 169034 | Collector  | 1948               | USDA     | Asia      | 5            |
| PI 183214 | Collector  | 1949               | USDA     | Africa    | 1            |
| PI 204758 | Unverified | 1953               | USDA     | Europ     | 4            |
| PI 204759 | Unverified | 1953               | USDA     | Europ     | 4            |
| PI 204761 | Unverified | 1953               | USDA     | Europ     | 3            |
| PI 204762 | Unverified | 1953               | USDA     | Europ     | 1            |
| PI 204763 | Unverified | 1953               | USDA     | Europ     | 4            |
| PI 204764 | Unverified | 1953               | USDA     | Europ     | 4            |
| PI 204765 | Unverified | 1953               | USDA     | Europ     | 1            |
| PI 204767 | Unverified | 1953               | USDA     | Europ     | 2            |
| PI 204768 | Unverified | 1953               | USDA     | Europ     | 2            |
| PI 204769 | Unverified | 1953               | USDA     | Europ     | 1            |
| PI 204772 | Unverified | 1953               | USDA     | Europ     | 1            |
| PI 204774 | Unverified | 1953               | USDA     | Europ     | 5            |
| PI 204775 | Unverified | 1953               | USDA     | Europ     | 1            |
| PI 204777 | Unverified | 1953               | USDA     | Europ     | 2            |
| PI 204782 | Unverified | 1953               | USDA     | Europ     | 2            |
| PI 208474 | Unverified | 1953               | USDA     | Europ     | 2            |
| PI 208478 | Unverified | 1953               | USDA     | Europ     | 2            |
| PI 208481 | Unverified | 1953               | USDA     | Europ     | 2            |
| PI 208482 | Unverified | 1953               | USDA     | Europ     | 2            |
| PI 208483 | Unverified | 1953               | USDA     | Europ     | 2            |
| PI 208484 | Unverified | 1953               | USDA     | Europ     | 3            |
| PI 209751 | Unverified | 1953               | USDA     | Europ     | 4            |
| PI 209756 | Unverified | 1953               | USDA     | Europ     | 1            |
| PI 209757 | Unverified | 1953               | USDA     | Europ     | 4            |
| PI 209758 | Unverified | 1953               | USDA     | Europ     | 3            |
| PI 212592 | Cultivar   | 1953               | USDA     | Asia      | 3            |
| PI 217934 | Unverified | 1954               | USDA     | Asia      | 4            |
| PI 225852 | Unverified | 1955               | USDA     | Europ     | 2            |
| PI 226504 | Unverified | 1955               | USDA     | Asia      | 5            |
| PI 231048 | Unverified | 1956               | USDA     | Asia      | 1            |
| PI 231207 | Unverified | 1956               | USDA     | Europ     | 1            |
| PI 231209 | Cultivar   | 1956               | USDA     | Europ     | 5            |
| PI 232070 | Unverified | 1956               | USDA     | Africa    | 3            |
| PI 234599 | Unverified | 1956               | USDA     | Africa    | 1            |
| PI 241589 | Unverified | 1957               | USDA     | Asia      | 3            |
| PI 241609 | Unverified | 1957               | USDA     | Australia | 1            |
| PI 241611 | Unverified | 1957               | USDA     | Australia | 5            |
| PI 241612 | Unverified | 1957               | USDA     | Australia | 1            |

| Accession | Type                       | Year of collection | Genebank | Origin        | DAPC_cluster |
|-----------|----------------------------|--------------------|----------|---------------|--------------|
| PI 241617 | Unverified                 | 1957               | USDA     | Australia     | 3            |
| PI 241620 | Unverified                 | 1957               | USDA     | Australia     | 3            |
| PI 244663 | Unverified                 | 1957               | USDA     | Asia          | 3            |
| PI 244830 | Unverified                 | 1958               | USDA     | North America | 5            |
| PI 244831 | Unverified                 | 1958               | USDA     | North America | 5            |
| PI 244833 | Unverified                 | 1958               | USDA     | North America | 5            |
| PI 244834 | Unverified                 | 1958               | USDA     | North America | 1            |
| PI 249533 | Commercial vegetable seeds | 1958               | USDA     | Europ         | 1            |
| PI 250127 | Unverified                 | 1958               | USDA     | Asia          | 5            |
| PI 261598 | Cultivar                   | 1959               | USDA     | North America | 1            |
| PI 261599 | Unverified                 | 1959               | USDA     | North America | 1            |
| PI 264651 | Unverified                 | 1960               | USDA     | Europ         | 2            |
| PI 264658 | Unverified                 | 1960               | USDA     | Europ         | 3            |
| PI 267722 | Unverified                 | 1960               | USDA     | North America | 1            |
| PI 267724 | Unverified                 | 1960               | USDA     | North America | 5            |
| PI 269311 | Unverified                 | 1960               | USDA     | Europ         | 5            |
| PI 269312 | Unverified                 | 1960               | USDA     | Europ         | 3            |
| PI 269313 | Unverified                 | 1960               | USDA     | Europ         | 4            |
| PI 269315 | Unverified                 | 1960               | USDA     | Europ         | 4            |
| PI 271320 | Unverified                 | 1960               | USDA     | Asia          | 3            |
| PI 271445 | Collector                  | 1961               | USDA     | Asia          | 5            |
| PI 274783 | Unverified                 | 1961               | USDA     | Asia          | 3            |
| PI 277272 | Unverified                 | 1961               | USDA     | Asia          | 3            |
| PI 277273 | Unverified                 | 1961               | USDA     | Asia          | 3            |
| PI 277275 | Unverified                 | 1961               | USDA     | Asia          | 5            |
| PI 284594 | Unverified                 | 1962               | USDA     | Europ         | 4            |
| PI 285061 | Unverified                 | 1962               | USDA     | Europ         | 4            |
| PI 285062 | Unverified                 | 1962               | USDA     | Europ         | 4            |
| PI 285275 | Unverified                 | 1962               | USDA     | Europ         | 3            |
| PI 289693 | Unverified                 | 1963               | USDA     | Australia     | 1            |
| PI 289694 | Unverified                 | 1963               | USDA     | Australia     | 1            |
| PI 289695 | Unverified                 | 1963               | USDA     | Australia     | 1            |
| PI 289696 | Unverified                 | 1963               | USDA     | Australia     | 1            |
| PI 291993 | Unverified                 | 1963               | USDA     | Asia          | 5            |
| PI 291995 | Unverified                 | 1963               | USDA     | Asia          | 3            |
| PI 291996 | Unverified                 | 1963               | USDA     | Asia          | 4            |
| PI 296130 | Unverified                 | 1964               | USDA     | North America | 5            |
| PI 320997 | Unverified                 | 1967               | USDA     | Asia          | 5            |
| PI 320998 | Unverified                 | 1967               | USDA     | Asia          | 3            |
| PI 320999 | Unverified                 | 1967               | USDA     | Asia          | 3            |
| PI 321001 | Unverified                 | 1967               | USDA     | Asia          | 3            |
| PI 343474 | Unverified                 | 1969               | USDA     | Europe        | 5            |

| Accession | Type              | Year of collection | Genebank | Origin | DAPC_cluster |
|-----------|-------------------|--------------------|----------|--------|--------------|
| PI 343475 | Unverified        | 1969               | USDA     | Europe | 3            |
| PI 343476 | Unverified        | 1969               | USDA     | Europe | 4            |
| PI 343478 | Unverified        | 1969               | USDA     | Europe | 3            |
| PI 343479 | Unverified        | 1969               | USDA     | Europe | 5            |
| PI 343481 | Unverified        | 1969               | USDA     | Europe | 2            |
| PI 343482 | Unverified        | 1969               | USDA     | Europe | 3            |
| PI 344269 | Unverified        | 1969               | USDA     | Asia   | 1            |
| PI 462216 | Unverified        | 1981               | USDA     | Europ  | 1            |
| PI 462223 | Unverified        | 1981               | USDA     | Europ  | 5            |
| PI 462225 | Unverified        | 1981               | USDA     | Europ  | 5            |
| BRA 1334  | Cultivar          | 1965               | IPK      | Europ  | 2            |
| BRA 1335  | Cultivar          | 1971               | IPK      | Europ  | 2            |
| BRA 1336  | Cultivar          | 1971               | IPK      | Europ  | 4            |
| BRA 1338  | Cultivar          | 1970               | IPK      | Europ  | 2            |
| BRA 1339  | Cultivar          | 1971               | IPK      | Europ  | 2            |
| BRA 1340  | Cultivar          | 1971               | IPK      | Europ  | 2            |
| BRA 1341  | Cultivar          | 1970               | IPK      | Europ  | 2            |
| BRA 1342  | Cultivar          | 1971               | IPK      | Europ  | 2            |
| BRA 1343  | Cultivar          | 1970               | IPK      | Europ  | 2            |
| BRA 1344  | Cultivar          | 1970               | IPK      | Europ  | 2            |
| BRA 1345  | Cultivar          | 1971               | IPK      | Europe | 4            |
| BRA 1346  | Cultivar          | 1971               | IPK      | Europ  | 2            |
| BRA 1347  | Cultivar          | 1971               | IPK      | Europ  | 2            |
| BRA 1348  | Cultivar          | 1970               | IPK      | Europ  | 2            |
| BRA 1349  | Breeding material | 1970               | IPK      | Europ  | 2            |
| BRA 1351  | Cultivar          | 1971               | IPK      | Europ  | 4            |
| BRA 1352  | Cultivar          | 1971               | IPK      | Europ  | 4            |
| BRA 1353  | Cultivar          | 1970               | IPK      | Europ  | 2            |
| BRA 1354  | Cultivar          | 1971               | IPK      | Europ  | 2            |
| BRA 1355  | Cultivar          | 1971               | IPK      | Europ  | 2            |
| BRA 1357  | Cultivar          | 1971               | IPK      | Europ  | 2            |
| BRA 1359  | Cultivar          | 1970               | IPK      | Europ  | 4            |
| BRA 1363  | Cultivar          | 1971               | IPK      | Europe | 4            |
| BRA 1364  | Cultivar          | 1970               | IPK      | Europ  | 4            |
| BRA 1365  | Cultivar          | 1971               | IPK      | Europ  | 4            |
| BRA 1366  | Cultivar          | 1970               | IPK      | Europe | 4            |
| BRA 1367  | Cultivar          | 1971               | IPK      | Europ  | 4            |
| BRA 1368  | Breeding material | 1971               | IPK      | Europ  | 2            |
| BRA 1369  | Cultivar          | 1971               | IPK      | Europ  | 2            |
| BRA 1370  | Cultivar          | 1971               | IPK      | Europ  | 2            |
| BRA 1371  | Cultivar          | 1971               | IPK      | Europ  | 4            |
| BRA 1372  | Cultivar          | 1971               | IPK      | Europ  | 2            |

| Accession | Type              | Year of collection | Genebank | Origin    | DAPC_cluster |
|-----------|-------------------|--------------------|----------|-----------|--------------|
| BRA 1373  | Cultivar          | 1969               | IPK      | Europ     | 4            |
| BRA 1374  | Cultivar          | 1969               | IPK      | unknown   | 2            |
| BRA 1375  | Cultivar          | 1971               | IPK      | unknown   | 4            |
| BRA 1376  | Cultivar          | 1971               | IPK      | unknown   | 4            |
| BRA 1377  | Cultivar          | 1969               | IPK      | Europ     | 2            |
| BRA 1379  | Cultivar          | 1972               | IPK      | unknown   | 2            |
| BRA 1380  | Cultivar          | 1972               | IPK      | Europ     | 4            |
| BRA 1381  | Cultivar          | 1971               | IPK      | unknown   | 2            |
| BRA 1383  | Cultivar          | 1971               | IPK      | unknown   | 2            |
| BRA 1384  | Cultivar          | 1971               | IPK      | unknown   | 2            |
| BRA 1385  | Cultivar          | 1974               | IPK      | Europ     | 2            |
| BRA 1386  | Cultivar          | 1974               | IPK      | Europ     | 2            |
| BRA 1387  | Cultivar          | 1974               | IPK      | Europ     | 2            |
| BRA 1388  | Cultivar          | 1974               | IPK      | Europ     | 2            |
| BRA 1389  | Cultivar          | 1972               | IPK      | Europ     | 2            |
| BRA 1391  | Cultivar          | 1974               | IPK      | Europ     | 2            |
| BRA 1392  | Cultivar          | 1972               | IPK      | Europ     | 2            |
| BRA 1393  | Cultivar          | 1969               | IPK      | Europ     | 2            |
| BRA 1394  | Cultivar          | 1972               | IPK      | Europ     | 2            |
| BRA 1397  | Cultivar          | 1974               | IPK      | Europ     | 4            |
| BRA 1398  | Cultivar          | 1974               | IPK      | Europ     | 2            |
| BRA 1399  | Cultivar          | 1974               | IPK      | Europ     | 2            |
| BRA 1400  | Breeding material | 1974               | IPK      | Europ     | 2            |
| BRA 1401  | Cultivar          | 1974               | IPK      | Europ     | 2            |
| BRA 1402  | Cultivar          | 1974               | IPK      | Europ     | 2            |
| BRA 1403  | Cultivar          | 1974               | IPK      | Europe    | 2            |
| BRA 1406  | Cultivar          | 1974               | IPK      | Europe    | 4            |
| BRA 1407  | Breeding material | 1974               | IPK      | Europe    | 4            |
| BRA 1408  | Cultivar          | 1974               | IPK      | Europ     | 5            |
| BRA 1409  | Cultivar          | 1974               | IPK      | Europe    | 4            |
| BRA 1410  | Cultivar          | 1986               | IPK      | unknown   | 2            |
| BRA 1411  | Landrace          | 1987               | IPK      | Asia      | 1            |
| BRA 1414  | Cultivar          | 1990               | IPK      | Europ     | 2            |
| BRA 1415  | Cultivar          | 1971               | IPK      | Australia | 1            |
| BRA 1416  | Landrace          | 1981               | IPK      | Europ     | 4            |
| BRA 1480  | Cultivar          | 1971               | IPK      | Europe    | 4            |
| BRA 1481  | Cultivar          | 1972               | IPK      | Europe    | 4            |
| BRA 1482  | Cultivar          | 1974               | IPK      | Europ     | 4            |
| BRA 1483  | Cultivar          | 1974               | IPK      | unknown   | 4            |
| BRA 163   | Landrace          | 1957               | IPK      | Asia      | 4            |
| BRA 1750  | Hybrid            | 1994               | IPK      | Europ     | 3            |
| BRA 1785  | Cultivar          | 2001               | IPK      | Europ     | 2            |

| Accession | Type     | Year of collection | Genebank | Origin | DAPC_cluster |
|-----------|----------|--------------------|----------|--------|--------------|
| BRA 1789  | Landrace | 1991               | IPK      | Europ  | 1            |
| BRA 2039  | Cultivar | 2002               | IPK      | Europ  | 2            |
| BRA 2057  | Cultivar | 2002               | IPK      | Europ  | 2            |
| BRA 2058  | Cultivar | 2002               | IPK      | Europ  | 2            |
| BRA 290   | Cultivar | 1965               | IPK      | Europ  | 2            |
| BRA 283   | Cultivar | 1963               | IPK      | Europ  | 2            |
| BRA 284   | Cultivar | 1963               | IPK      | Europ  | 4            |

**Table S2** Summary of phenotypic variation and estimates of broad-sense heritability ( $H^2$ ) for all traits. Influence of Genotype (G), Environment (E), and Genotype-Environment interaction ( $G \times E$ ) were tested using an ANOVA. \*\*\* Significant at  $p < 0.001$ .

| Trait           | Trait value       |              | G   | E   | $G \times E$ | $H^2$ |
|-----------------|-------------------|--------------|-----|-----|--------------|-------|
|                 | Mean $\pm$ SD     | Range        |     |     |              |       |
| Curd width      | 13.52 $\pm$ 0.73  | 11.11-15.29  | *** | *** | ***          | 0.437 |
| Cluster width   | 4.38 $\pm$ 0.39   | 2.86-5.28    | *** | *** | ***          | 0.564 |
| No. of branches | 11.17 $\pm$ 0.59  | 9.71-13.40   | *** | *** | ***          | 0.264 |
| Apical length   | 1.19 $\pm$ 0.14   | 0.74-1.65    | *** | *** | ***          | 0.111 |
| Nearest branch  | 1.68 $\pm$ 0.17   | 1.19-2.23    | *** | *** | ***          | 0.050 |
| No. of days     | 75.23 $\pm$ 11.68 | 45.57-118.43 | *** | *** | ***          | 0.943 |

6

**Table S3** Phenotypic and genotypic correlation coefficients between traits. Values below the diagonal represent phenotypic correlation coefficients (correlation of BLUEs). Values above the diagonal are genetic correlation coefficients (correlation of BLUPs). \*\* Significant at  $P < 0.01$ , \*\*\* Significant at  $P < 0.001$ .

| Trait           | Curd width | Cluster width | No. of branches | Apical length | Nearest branch | No. of days |
|-----------------|------------|---------------|-----------------|---------------|----------------|-------------|
| Curd width      | -          | 0.59          | 0.004           | 0.27          | 0.24           | 0.04        |
| Cluster width   | 0.69***    | -             | 0.07            | 0.25          | 0.32           | -0.21       |
| No. of branches | -0.27***   | -0.16*        | -               | -0.27         | -0.21          | -0.23       |
| Apical length   | 0.64***    | 0.42***       | -0.41***        | -             | 0.71           | -0.03       |
| Nearest branch  | 0.50***    | 0.50***       | -0.37***        | 0.79***       | -              | -0.07       |
| No. of days     | 0.09       | -0.13         | -0.22**         | 0.01          | 0.11           | -           |

**Table S4** Geographic origin according to USDA and IPK passport information of accessions for each inferred DAPC cluster.

| Cluster | Africa | Asia | Australia | Europe | USA | Russia | Unknown origin | Cluster size |
|---------|--------|------|-----------|--------|-----|--------|----------------|--------------|
| 1       | 2      | 3    | 6         | 11     | 4   | 0      | 0              | 25           |
| 2       | 0      | 0    | 0         | 54     | 0   | 2      | 6              | 56           |
| 3       | 1      | 11   | 2         | 7      | 0   | 3      | 0              | 24           |
| 4       | 0      | 3    | 0         | 25     | 0   | 8      | 4              | 40           |
| 5       | 0      | 8    | 1         | 6      | 5   | 2      | 0              | 22           |

**Table S5** Overview of  $\lambda$  values. Values close to one indicate no confounding due to population structure.

|                       | Unimputed data |      | Imputed data |      |
|-----------------------|----------------|------|--------------|------|
|                       | EMMAX          | MLMM | EMMAX        | MLMM |
| Curd width            | 1              | 0.87 | 1            | 0.98 |
| Cluster width         | 1.08           | 0.98 | 1.02         | 1.02 |
| No. of branches       | 1.09           | 1.13 | 0.995        | 1    |
| Apical length         | 1.03           | 1.05 | 1.02         | 0.93 |
| Nearest branch length | 1.11           | 0.99 | 1.04         | 1.02 |
| No. of days           | 1.18           | 1.18 | 1.01         | 1    |

**Table S6** Phenotypic variance explained due to population structure. PC = Principle component.

| PC  | Curd width | Cluster width | No. branches | Length nearest | Apical lengt1 | No. days |
|-----|------------|---------------|--------------|----------------|---------------|----------|
| PC1 | 16.37      | 40.01         | 2.54         | 6.7            | 4.01          | 1.86     |
| PC2 | 1.64       | 2.23          | 4.26         | 2.22           | 0.94          | 27.66    |
| PC3 | 0.51       | 0             | 2.23         | 0.58           | 0.06          | 3.11     |

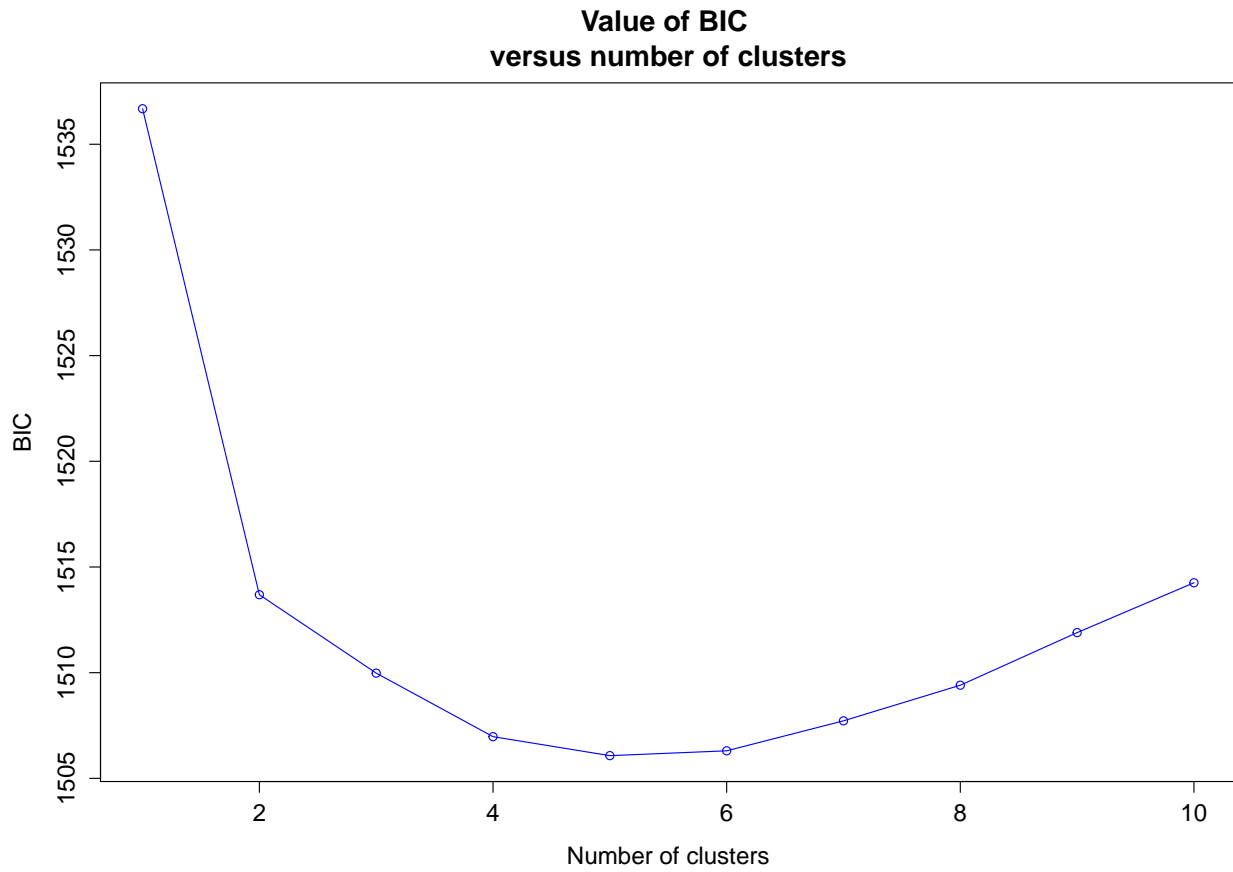

**Figure S1** BIC values of the k-means clustering algorithm. Lowest value shows most likely number of clusters (5).



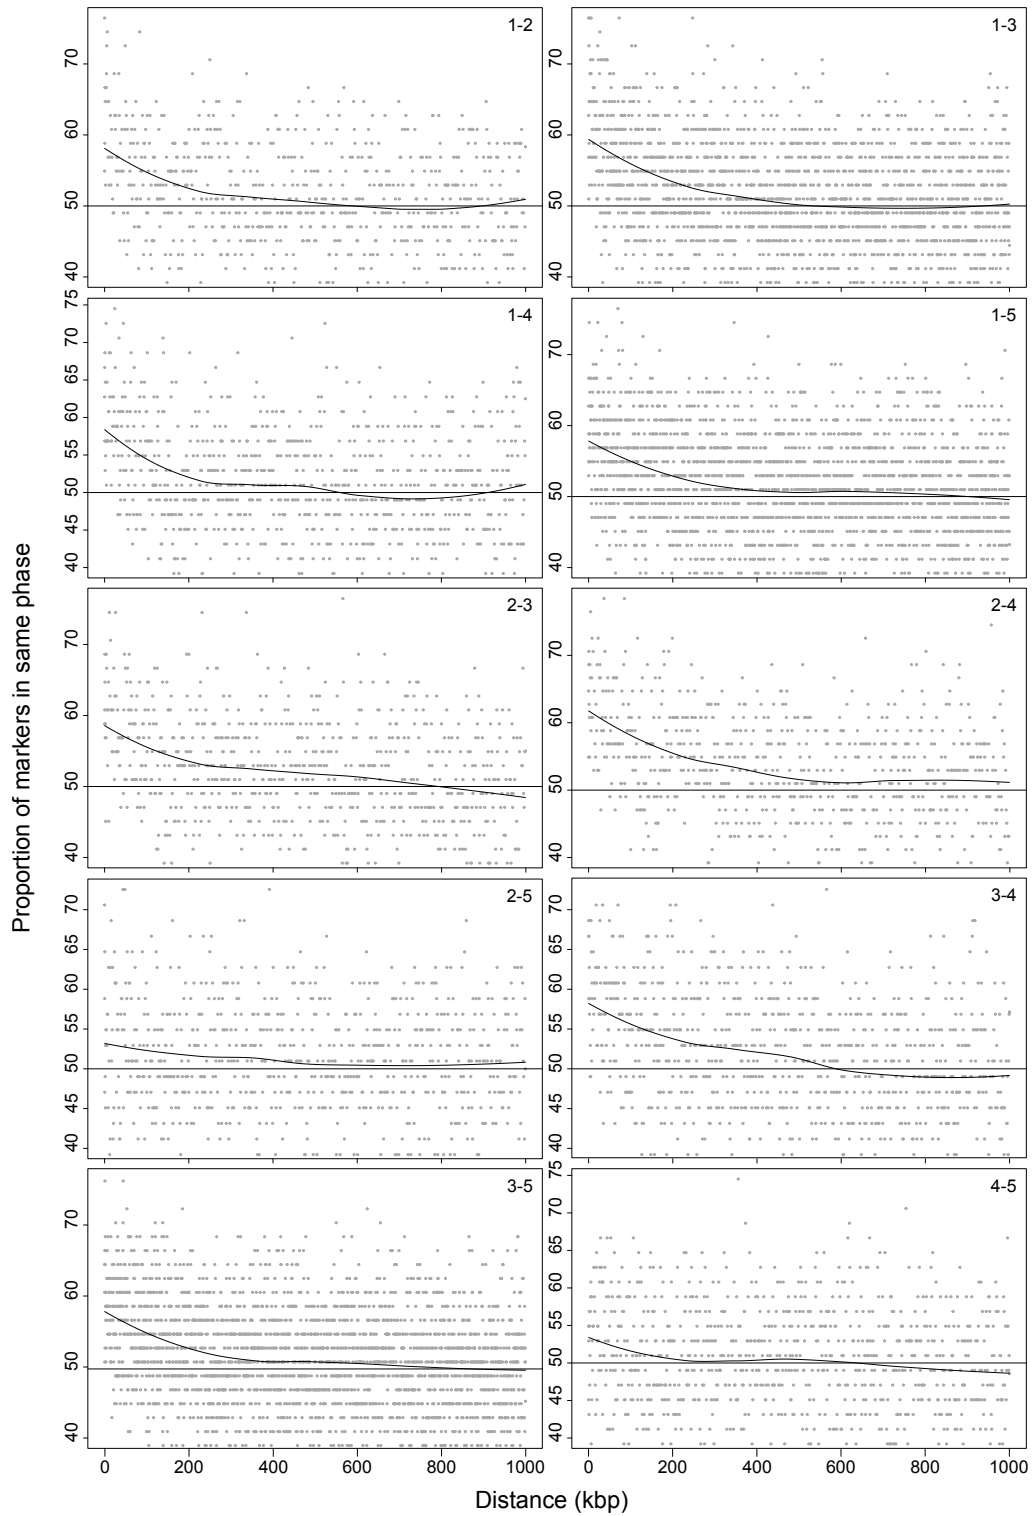

**Figure S2** Persistence of linkage phase calculated based on the proportion of markers that share the same sign between same chromosomes in different cluster. Positions are the averages of groups of 50 markers.

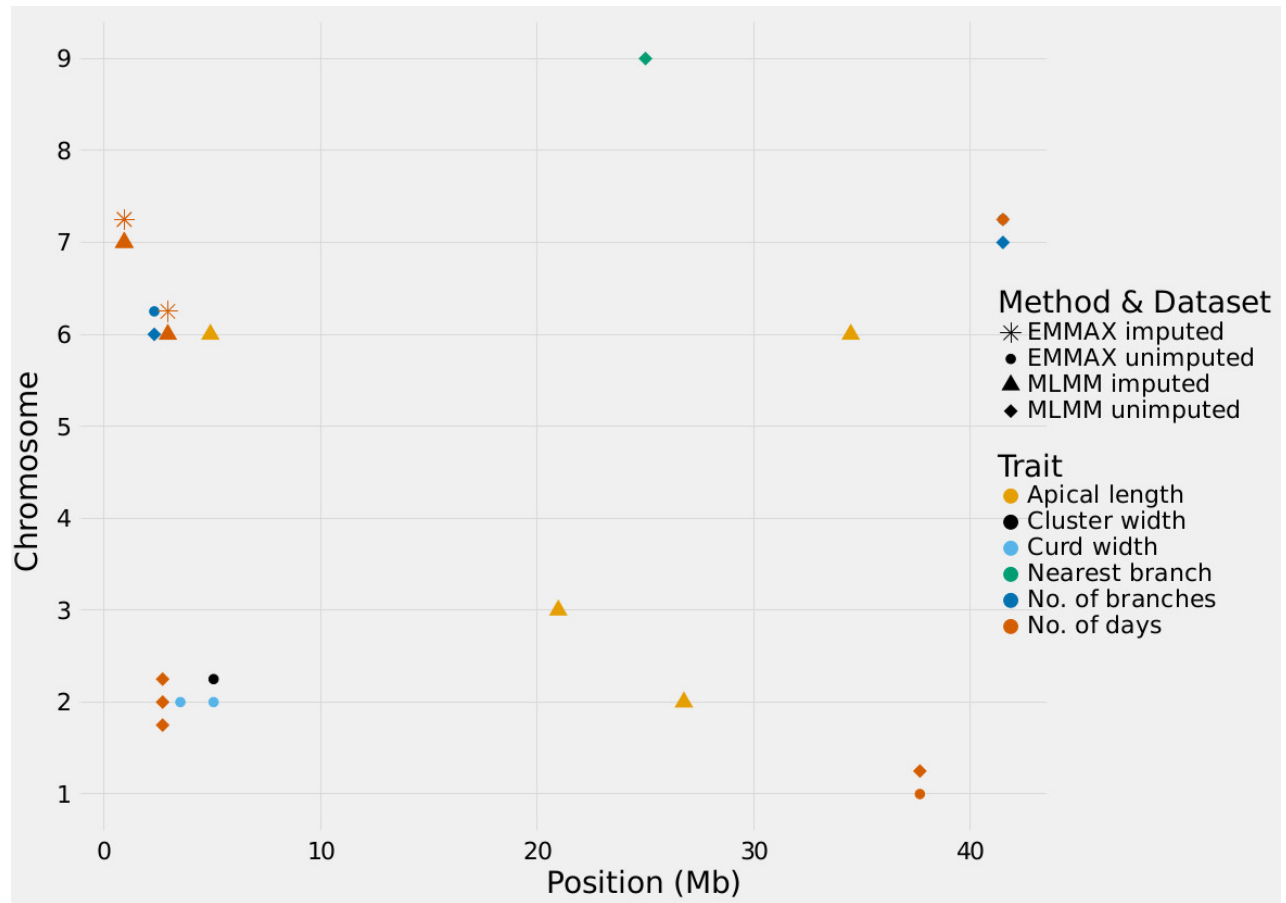

**Figure S3** Overview, of the GWAS results for EMMAX and MLMM with the unimputed and imputed data sets for each trait, respectively.

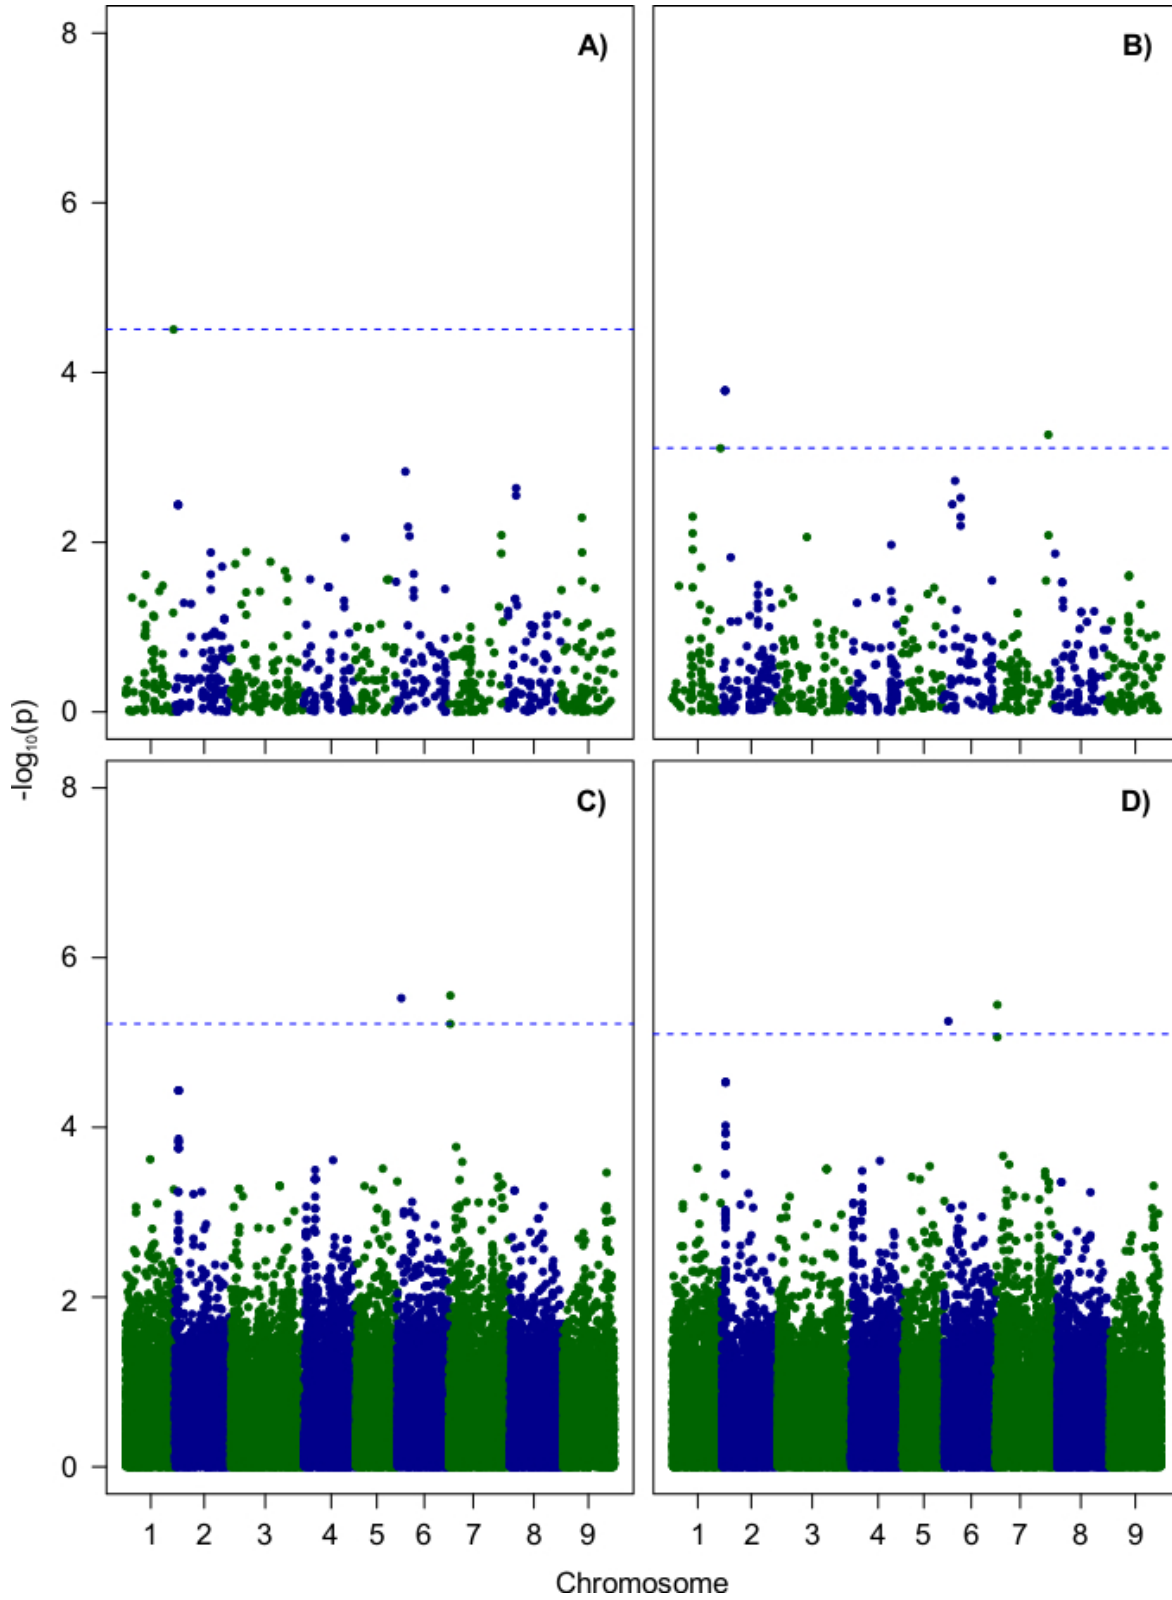

**Figure S4** Manhattan plots of the GWAS results for the trait number of days to budding. a) EMMAX and b) MLMM results for the unimputed data set and c) EMMAX and d) MLMM result for the imputed data set. The blue dotted line is the significant threshold based on the FDR.

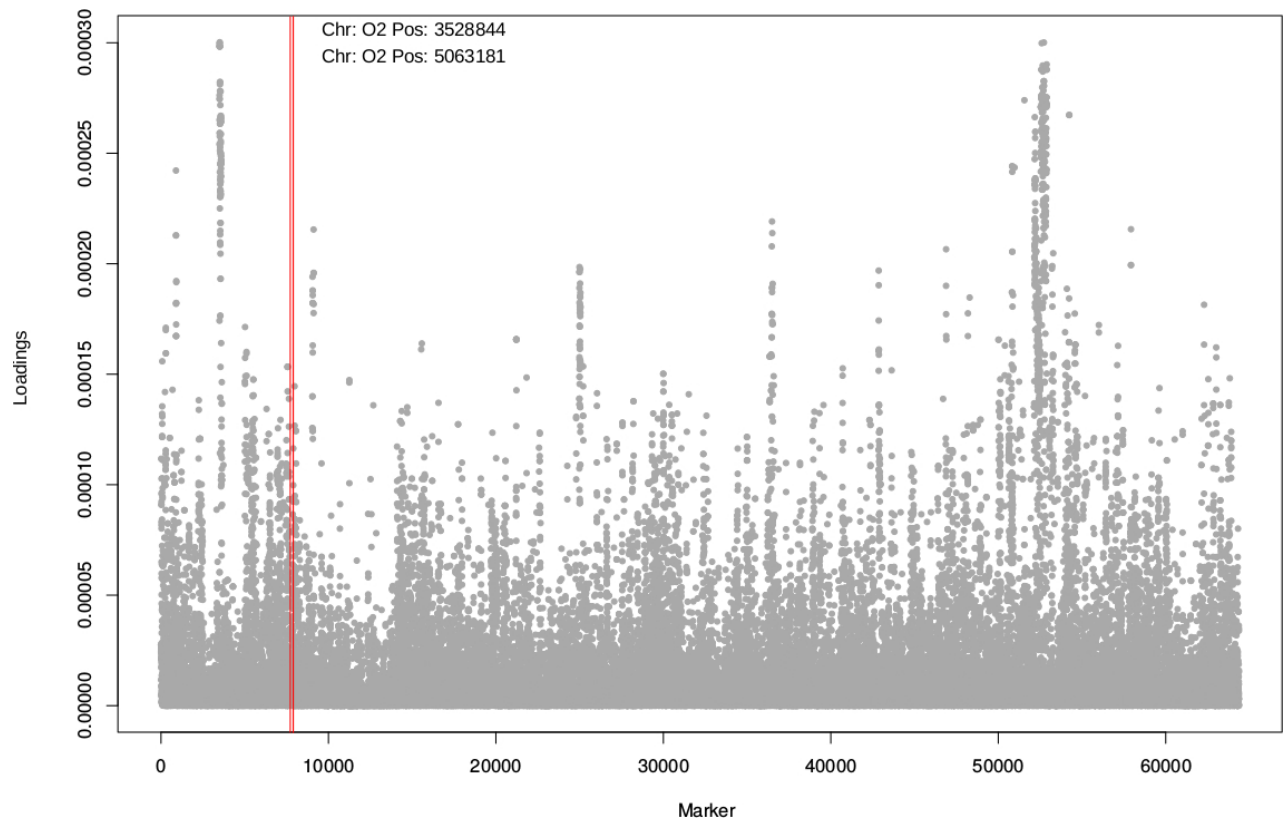

**Figure S5** Loading plot of the first principle component using the imputed data set. Red lines show positions of significant QTLs detected for the traits curd width and cluster width using the unimputed data set.

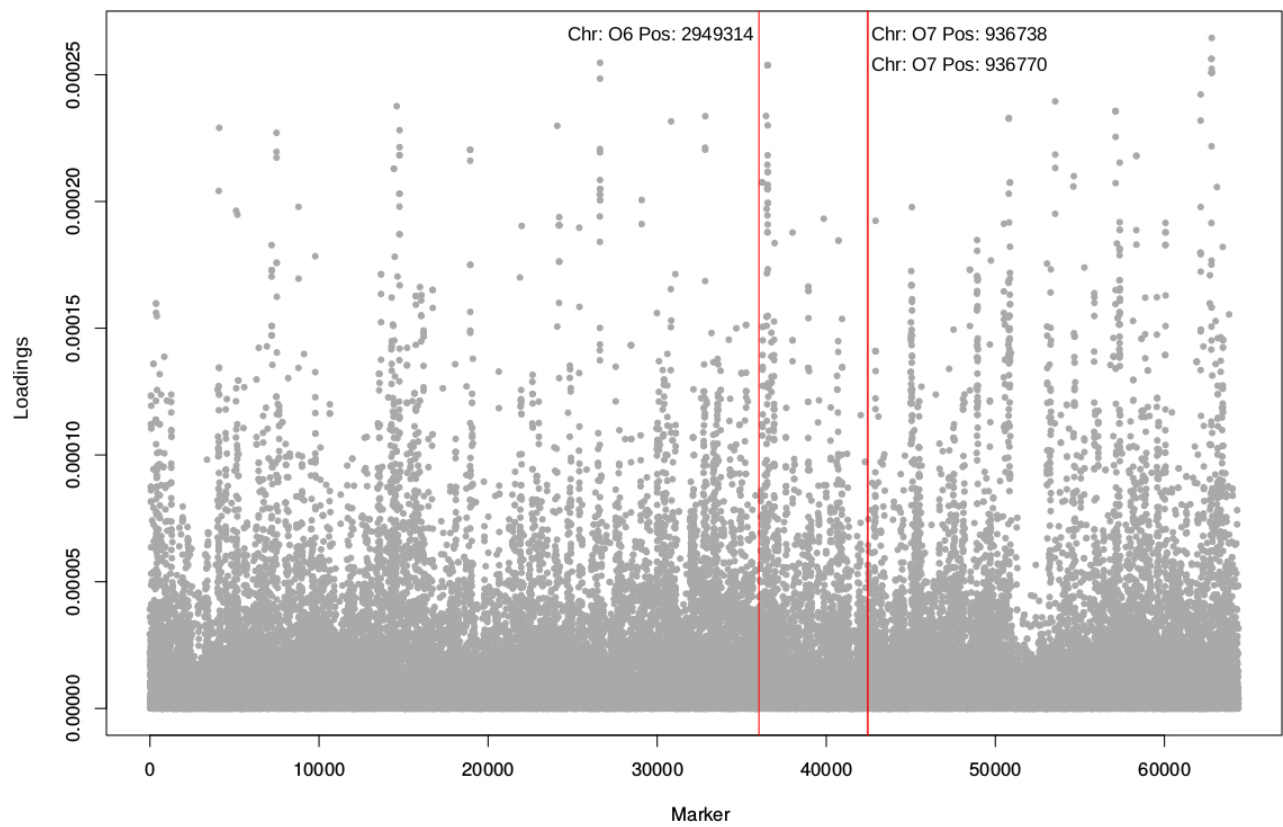

**Figure S6** Loading plot of the second principle component using the imputed data set. Red lines show positions of significant QTLs detected for the trait no. of days to budding using the imputed data set.
